# Supplementary material for: In vivo study and thermodynamic investigation of two lanthanum complexes, La(dpp)3 and La(XT), for the treatment of bone resorption disorders
Source: Royal Society of Chemistry journal article supplement (doi:10.1039/c5sc01767j), 2015-01-01
Supplement: c5sc01767j1.pdf [file c5sc01767j1.pdf]

Electronic Supplementary Information (ESI) for:

***In vivo* study and thermodynamic investigation of two lanthanum complexes,  
La(dpp)<sub>3</sub> and La(XT), for the treatment of bone resorption disorders**

J. F. Cawthray, <sup>†a</sup> D. M. Weekes, <sup>†b</sup> O. Sivak,<sup>c</sup> A. L. Creagh,<sup>d</sup> F. Ibrahim,<sup>e</sup> M. lafrate,<sup>b</sup> C. A. Haynes,<sup>d</sup> K. M. Wasan<sup>\*a</sup>  
and C. Orvig<sup>\*b</sup>

Fig. S1a: Speciation plot calculated for solutions of  $\text{La}^{3+}$ -Hdpp under typical conditions employed for ITC.  $[\text{La}^{3+}] = 0.0025\text{M}$ ,  $[\text{Hdpp}] = 0.010\text{M}$

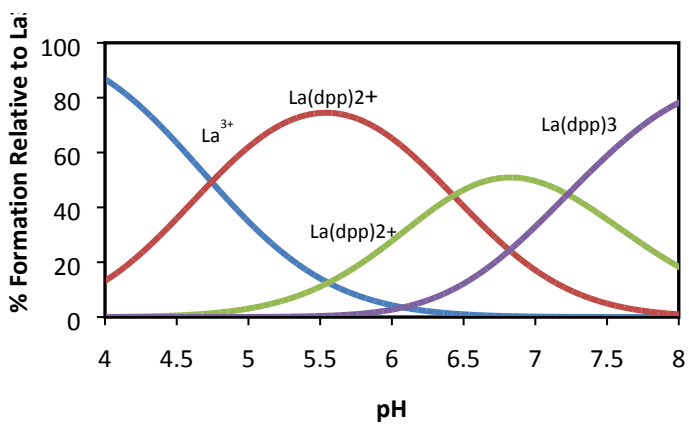

Fig. S1b: Speciation plot calculated for solutions of  $\text{La}^{3+}$ -Hdpp under typical conditions employed for ITC following first injection of 10  $\mu\text{l}$ .  $[\text{La}^{3+}] = 0.0000177\text{M}$ ,  $[\text{Hdpp}] = 0.0000709\text{M}$

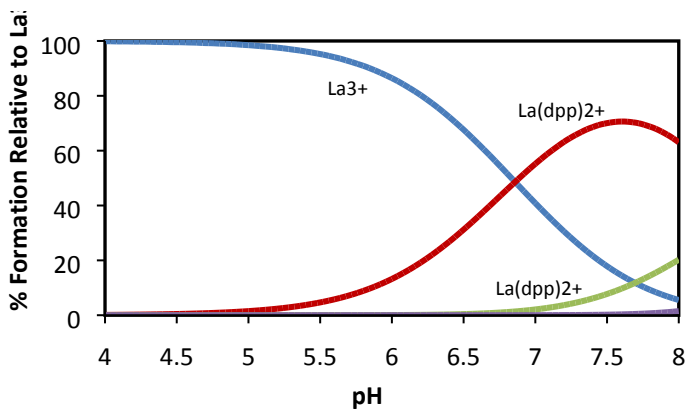

**Fig. S2: ITC analysis of H<sub>5</sub>XT-hydroxyapatite titration at 37 °C at pH 7.4 (100mM HEPES). (Upper) Raw titration data for 10µL injections of 30.4mM H<sub>5</sub>XT<sup>+</sup> into the ITC cell containing 1.1 mM formula units of hydroxyapatite. (Lower) Integrated heat data (points) and best fit (line) to a one-site bimolecular-bimolecular binding model.**

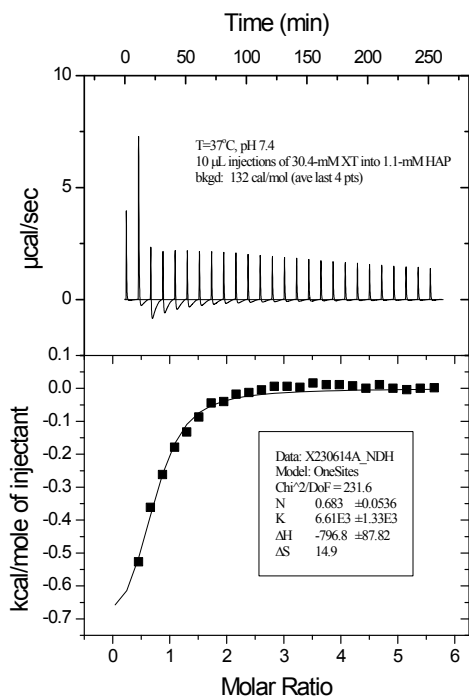

**Fig. S3: Speciation plot calculated for solutions of La<sup>3+</sup>-H<sub>5</sub>XT under typical conditions employed for ITC. [La<sup>3+</sup>] = 0.0025M, [H<sub>5</sub>XT] = 0.010M**

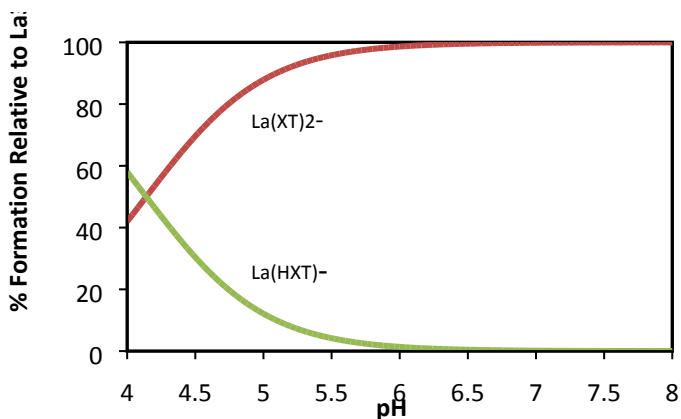

**Table S1: Plasma concentrations of La(dpp)3 and LaXT following IV dose of 1mg/kg/day taken at beginning & end of trial (ng/g weight, mean  $\pm$  SD, n=6).**

| <b>La(dpp)</b> | <b>t=0</b> | <b>t=end</b> | <b>LaXT</b> | <b>t=0</b> | <b>t=end</b> |
|----------------|------------|--------------|-------------|------------|--------------|
|                | 3.8        | 4971.8       |             | 6.9        | 5843.4       |
|                | 8.1        | 4668.4       |             | 3.7        | 6432.4       |
|                | 6.6        | 4232.8       |             | 9.3        | 5776.8       |
|                | 10.0       | 7201.5       |             | 9.5        | 6337.3       |
|                | 6.0        | 6740.2       |             | 3.8        | 5782.3       |
|                | 6.8        | 5287.1       |             | 7.2        | 5819.9       |
| <b>Mean</b>    | 6.9        | 5517.0       | <b>Mean</b> | 6.8        | 5998.7       |
| <b>SD</b>      | 2.1        | 1187.7       | <b>SD</b>   | 2.5        | 301.6        |
